# Supplementary material for: A nano-liposome formulation of the PARP inhibitor Talazoparib enhances treatment efficacy and modulates immune cell populations in mammary tumors of BRCA-deficient mice
Source: PubMed Central journal article supplement (PMC6735511; doi:10.7150/thno.36281), 2019-08-14
Supplement: thnov09p6224s1.pdf [file thnov09p6224s1.pdf]

**Figure S1** Validation of free TLZ drug removal after encapsulation. The non-encapsulated drug, which is insoluble in aqueous media, was removed via a syringe filter. A. Chromatogram of a 500 ng/mL TLZ standard. B. To test whether free drug can be removed using this syringe filter method, the total amount of drug in 1 ml of formulation was added to 1 ml of PBS and filtered. This solution was analyzed using the same HPLC protocol as the nanoparticles, and no TLZ was detected.

**Figure S2** Cell viability after treatment of vehicle. W780 BRCA-deficient cells were seeded into 96 well plates at 1000 cells/well. Cells were exposed to vehicle (empty nanoparticles) or PBS (vehicle in which NanoTLZ is stored) at the volume equivalent of 10  $\mu$ M NanoTLZ as used in Fig. 1D. One week after seeding, cell viability was ascertained by the MTS assay. Percent cell viability was normalized to control. Data presented as mean  $\pm$  SD.

**Figure S3** Body weight of BRCA-deficient mice during NanoTLZ or TLZ treatment.  $Brcal^{Co/Co};MMTV-Cre;p53^{+/-}$  mice bearing tumors 4 mm in diameter were treated with either NanoTLZ by i.v. or free Talazoparib by gavage (0.33 mg/kg, 3 times a week). Mice were weighed each time before treatment. Data presented as mean  $\pm$  SEM. N=8/group.

**Figure S4** Histology of liver tissues after NanoTLZ treatment.  $Brcal^{Co/Co};MMTV-Cre;p53^{+/-}$  mice bearing tumors 4 mm in diameter were treated with either saline or NanoTLZ (0.33 mg/kg, 3 times a week). Mice were euthanized when tumors reached 10 mm in diameter and the liver was collected. Liver tissues were fixed in 10% formalin and histology slides were stained with

Haemotoxylin and Eosin. Representative images are shown for 2 mice per group. 400x magnification.

**Figure S5** Empty nanoparticles upregulate the expression of *Cxcl12*. RNA was isolated from tumors of *Brcal<sup>Co/Co</sup>;MMTV-Cre;p53<sup>+/-</sup>* mice treated with empty nanoparticles for 5 doses. The expression of genes, including *Top2a*, *Sod3*, *Cxcl12*, that were significantly regulated by NanoTLZ were measured and compared to saline treated tumors. \*,  $p < 0.05$  vs. saline. N=5 mice/group. Data presented as mean  $\pm$  SEM.

**Figure S6** Quantification of western blotting for Fig. 5D. Immunoblots in Fig. 5D were quantified by Image J. Protein level was normalized to vinculin loading control and then saline controls. Data presented as mean  $\pm$  SEM.

**Figure S7** i.v. TLZ decreases proliferation and induces DNA damage in BRCA-deficient tumors. A. Protein expression of PCNA, CyclinD1, CyclinE1 in tumors from *Brcal<sup>Co/Co</sup>;MMTV-Cre;p53<sup>+/-</sup>* mice treated with saline or i.v. TLZ. Vinculin was used as the loading control. B. Immunohistochemistry of PCNA and  $\gamma$ H2AX in tumor sections. 400x magnification.

**Figure S8** Quantification of Foxp3 staining around tumors. IHC staining in Fig. 6D was quantified by Image J. Percentage of Foxp3 positive cells around tumors was calculated. Data presented as mean  $\pm$  SEM. \*\*,  $p < 0.01$  vs. saline. N=8/group.

Figure S1

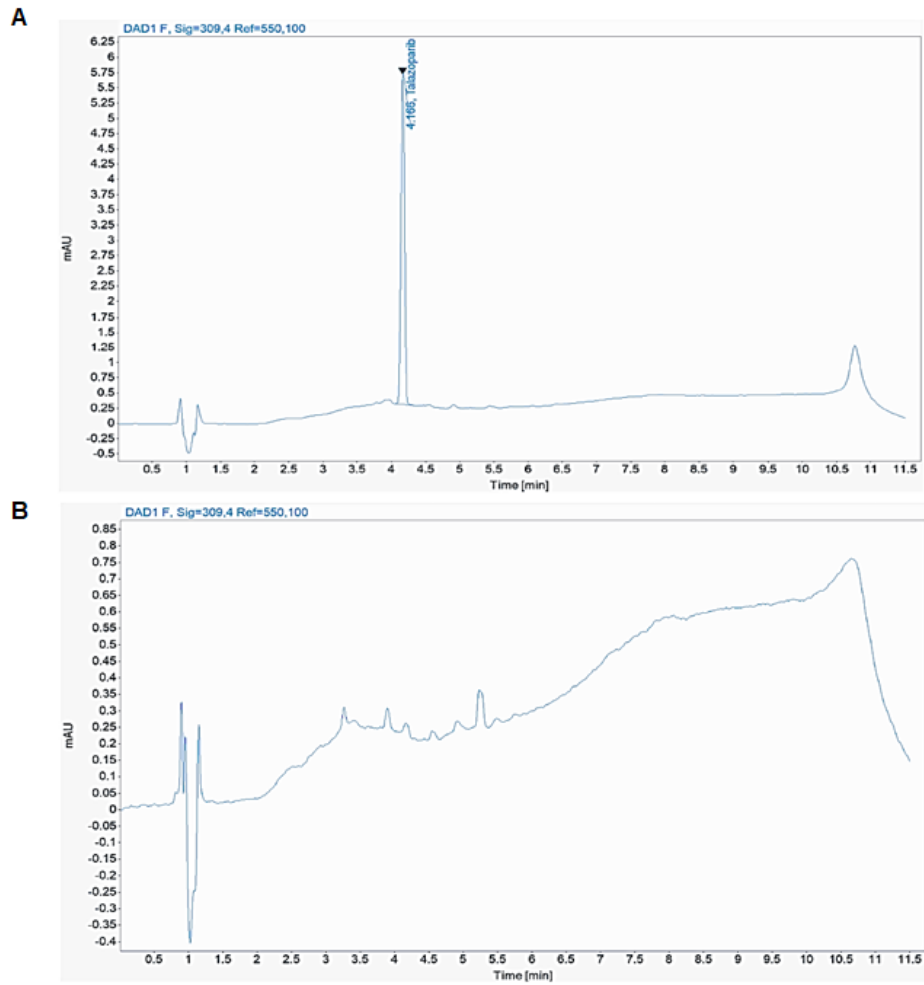

Figure S2

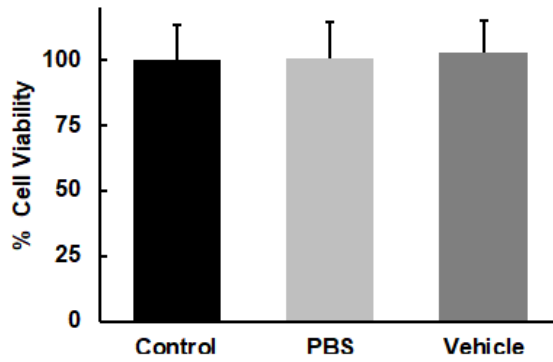

Figure S3

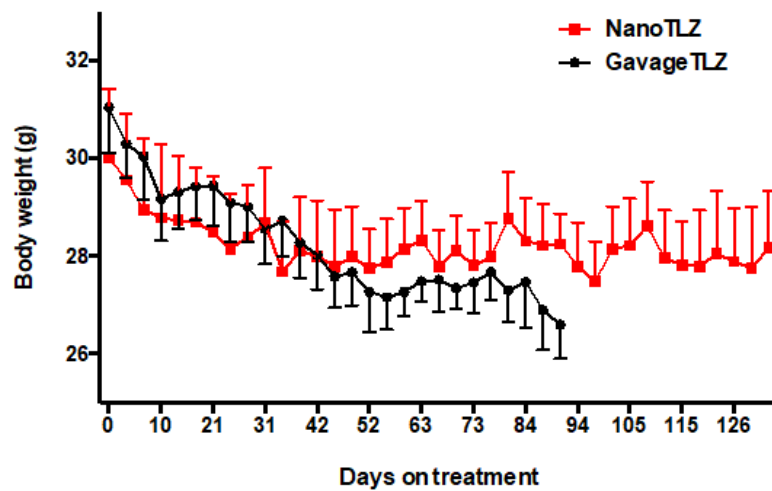

Figure S4

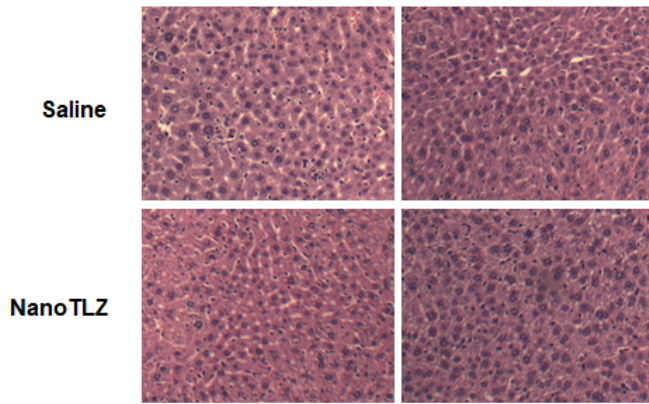

Figure S5

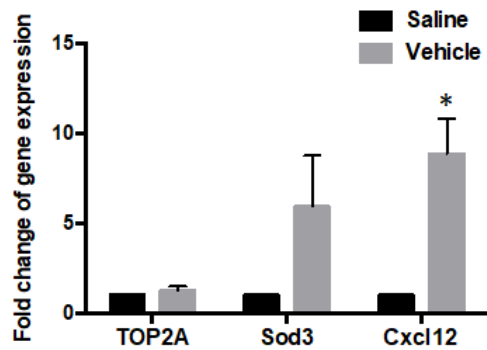

Figure S6

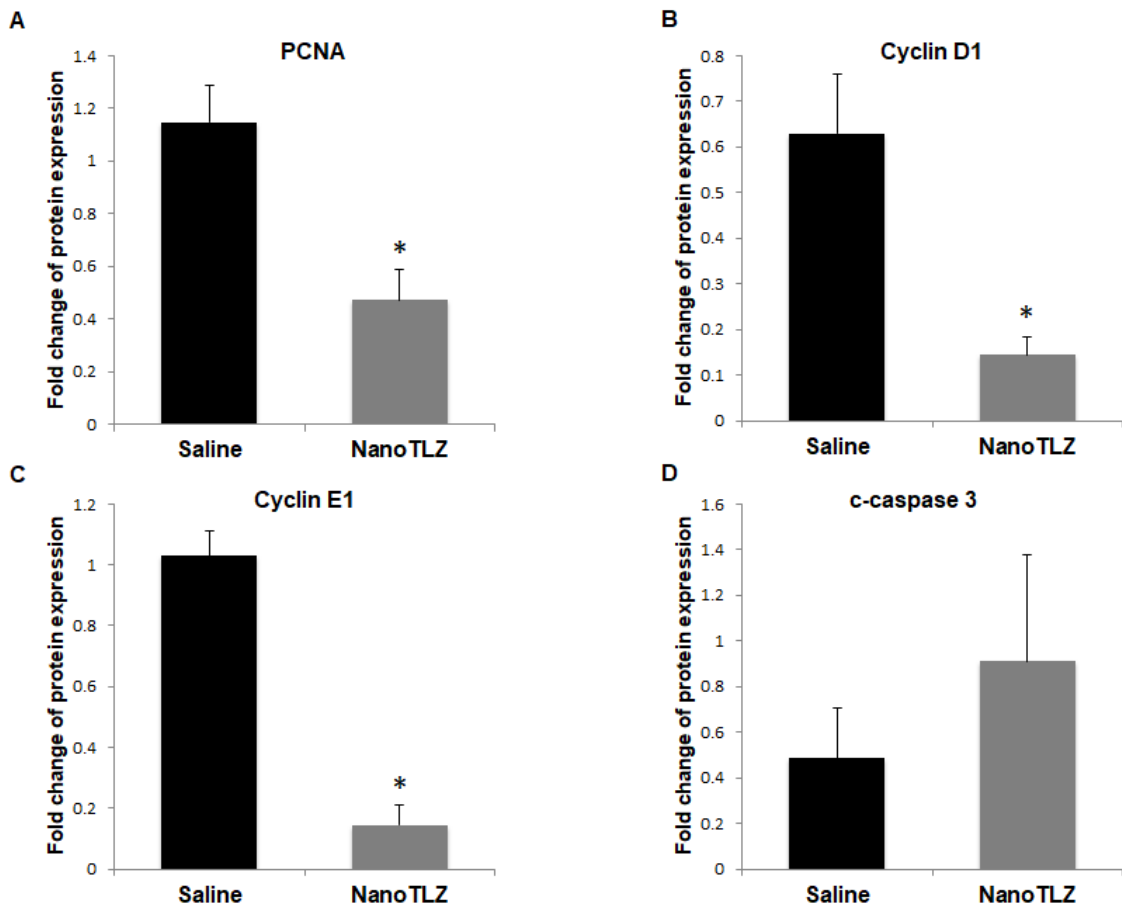

Figure S7

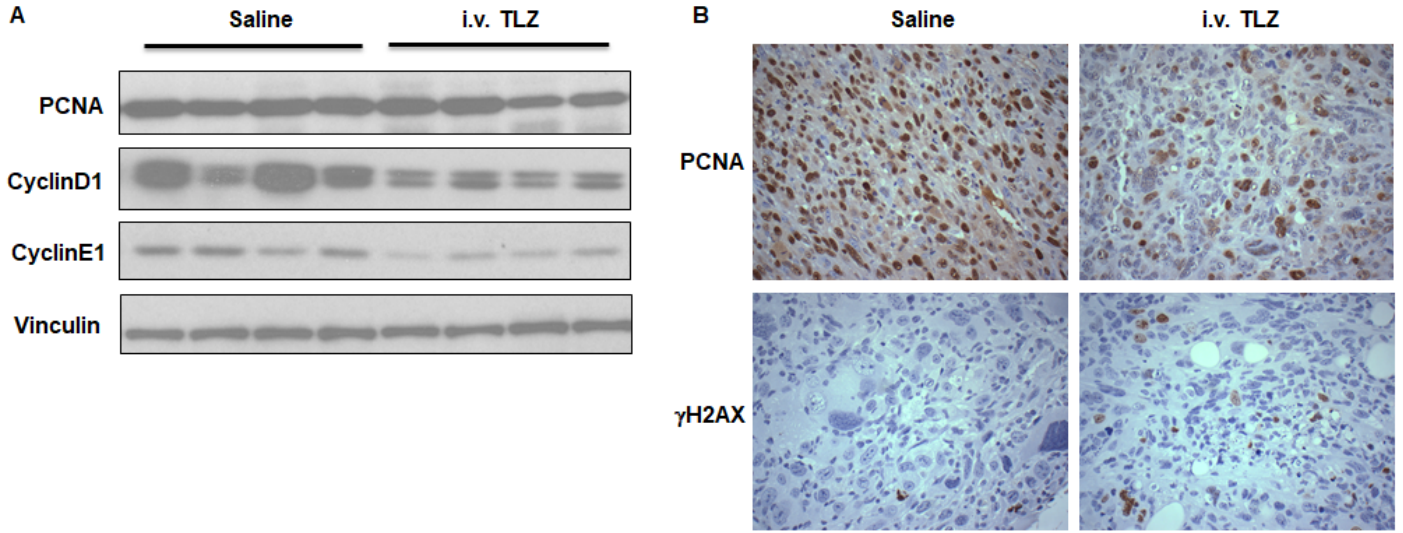

Figure S8

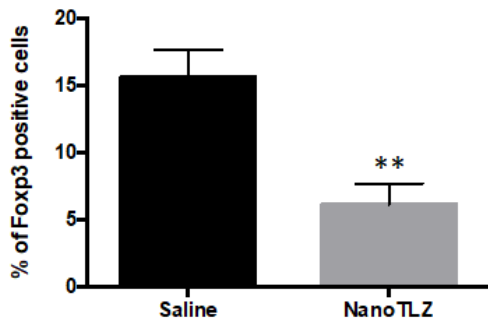

Table S1. Primer sequence

| <b>Gene</b>     | <b>Forward</b>           | <b>Reverse</b>           |
|-----------------|--------------------------|--------------------------|
| <i>Kit</i>      | TCAACGACCTTCCCGAAGGCACCA | CTGGTGGTTCAGAGTTCCATAGAC |
| <i>Top2a</i>    | TTCTTGATATGCCCTTTGG      | GCTTCAACAGCCTCCAATTC     |
| <i>Sod3</i>     | GTGTCCCAAGACAATC         | GTGCTATGGGGACAGG         |
| <i>Tnfrsf19</i> | CTGGATTTGAAGTTTGTCTG     | CGTGTTTATTCCTGCTACTC     |
| <i>Eef1a2</i>   | GCCACGATCAGCACTGCG       | CAAGCGGACCATCGAGAAGT     |
| <i>Myb</i>      | TGTCCTCAAAGCCTTTACCG     | TTCACGTATTTCCGAGCCG      |
| <i>GAPDH</i>    | AGGTCGGTGTGAACGGATTTG    | TGTAGACCATGTAGTTGAGGTCA  |

Table S2. Differentially expressed genes in the tumor between saline and i.v.TLZ groups

| Gene_ID           | Saline      | i.v. TLZ    | log2Fold<br>Change | pvalue     | padj      | GeneName  | Chrom | GeneDescription                                           |
|-------------------|-------------|-------------|--------------------|------------|-----------|-----------|-------|-----------------------------------------------------------|
| ENSMUSG0000000120 | 29.23307547 | 258.6173387 | 2.3279             | 6.04E-05   | 0.019301  | Ngfr      | chr11 | nerve_growth_factor_receptor_(TNFR_superfamily_member_16) |
| ENSMUSG0000000861 | 1014.639891 | 122.3377625 | -2.212             | 0.0001863  | 0.040763  | Bcl11a    | chr11 | B_cell_CLL/lymphoma_11A_(zinc_finger_protein)             |
| ENSMUSG0000004347 | 206.8500299 | 9.805225252 | -2.5869            | 6.47E-05   | 0.019579  | Pde1c     | chr6  | phosphodiesterase_1C                                      |
| ENSMUSG0000004360 | 72.00858758 | 1.734986211 | -2.6401            | 6.58E-05   | 0.019579  | Rik       | chr10 | RIKEN_cDNA_9330159F19_gene                                |
| ENSMUSG0000005672 | 6618.945697 | 2182.89878  | -1.4499            | 0.00019519 | 0.041239  | Kit       | chr5  | kit_oncogene                                              |
| ENSMUSG0000005716 | 230.4925517 | 0.717262265 | -4.6561            | 7.54E-14   | 3.25E-10  | Pvalb     | chr15 | parvalbumin                                               |
| ENSMUSG0000006457 | 365.2921968 | 4.886816862 | -3.6079            | 1.73E-08   | 3.95E-05  | Actn3     | chr19 | actinin_alpha_3                                           |
| ENSMUSG0000009394 | 17.15143524 | 195.3436831 | 2.4552             | 4.90E-05   | 0.017091  | Syn2      | chr6  | synapsin_II                                               |
| ENSMUSG0000015519 | 305.4260516 | 5.160700621 | -3.0007            | 5.13E-06   | 0.0035771 | Rik       | chr10 | RIKEN_cDNA_2310057J18_gene                                |
| ENSMUSG0000016349 | 77.2503192  | 1.075893397 | -2.502             | 0.00017523 | 0.039824  | Eef1a2    | chr2  | eukaryotic_translation_elongation_factor_1_alpha_2        |
| ENSMUSG0000018102 | 391.9271153 | 1543.116925 | 1.7394             | 6.13E-05   | 0.019301  | Hist1h2bc | chr13 | histone_cluster_1_H2bc                                    |
| ENSMUSG0000018907 | 170.4773238 | 1327.929647 | 2.1702             | 0.0002169  | 0.04465   | Alox12e   | chr11 | arachidonate_lipoxygenase_epidermal                       |
| ENSMUSG0000018907 | 55.38212112 | 0.313844758 | -2.9882            | 6.57E-06   | 0.0040586 | Trdn      | chr10 | triadin                                                   |

|           |             |             |         |          |           |           |       |                                                                          |
|-----------|-------------|-------------|---------|----------|-----------|-----------|-------|--------------------------------------------------------------------------|
| 000019787 |             |             |         |          |           |           |       |                                                                          |
| ENSMUSG00 |             |             |         |          | 0.0004765 |           |       | solute_carrier_family_22_(or<br>organic_cation_transporter)_m<br>ember_4 |
| 000020334 | 29.11473953 | 206.9442724 | 2.4047  | 3.86E-07 | 5         | Slc22a4   | chr11 |                                                                          |
| ENSMUSG00 |             |             |         |          |           |           |       | topoisomerase_(DNA)_II_al<br>pha                                         |
| 000020914 | 6468.651913 | 1717.911913 | -1.7216 | 1.66E-05 | 0.0074244 | Top2a     | chr11 |                                                                          |
| ENSMUSG00 |             |             |         |          |           |           |       |                                                                          |
| 000021070 | 15.17087595 | 90.22290885 | 2.0271  | 0.000188 | 0.040763  | Bdkrb2    | chr12 | bradykinin_receptor_beta_2                                               |
| ENSMUSG00 |             |             |         |          |           |           |       |                                                                          |
| 000022483 | 290.3343326 | 3291.191384 | 3.115   | 8.10E-14 | 3.25E-10  | Col2a1    | chr15 | collagen_type_II_alpha_1                                                 |
| ENSMUSG00 |             |             |         |          |           | 4930451G0 |       | RIKEN_cDNA_4930451G09                                                    |
| 000022543 | 119.8691234 | 18.29671379 | -2.1553 | 5.59E-05 | 0.018708  | 9Rik      | chr16 | _gene                                                                    |
| ENSMUSG00 |             |             |         | 0.000227 |           |           |       |                                                                          |
| 000023484 | 5.481498369 | 58.33632045 | 2.2859  | 36       | 0.046212  | Prph      | chr15 | peripherin                                                               |
| ENSMUSG00 |             |             |         |          |           |           |       | cytochrome_P450_family_2<br>1_subfamily_a_polypeptide_<br>1              |
| 000024365 | 8.652294956 | 168.8876653 | 2.8428  | 4.67E-06 | 0.0035698 | Cyp21a1   | chr17 |                                                                          |
| ENSMUSG00 |             |             |         |          |           |           |       |                                                                          |
| 000024471 | 47.11432513 | 0           | -2.9441 | 9.73E-06 | 0.0051501 | Myot      | chr18 | myotilin                                                                 |
| ENSMUSG00 |             |             |         |          |           |           |       |                                                                          |
| 000025347 | 1.839590732 | 45.2392207  | 2.5699  | 7.93E-05 | 0.021695  | Mettl7b   | chr10 | methyltransferase_like_7B                                                |
| ENSMUSG00 |             |             |         |          |           |           |       |                                                                          |
| 000025875 | 333.093697  | 1415.539776 | 1.8298  | 3.02E-05 | 0.012117  | Tspan17   | chr13 | tetraspanin_17                                                           |
| ENSMUSG00 |             |             |         |          |           |           |       |                                                                          |
| 000025930 | 10.91563416 | 99.5420372  | 2.4863  | 5.35E-06 | 0.0035771 | Msc       | chr1  | musculin                                                                 |
| ENSMUSG00 |             |             |         |          |           | 3110079O1 |       | RIKEN_cDNA_3110079O15                                                    |
| 000026258 | 3608.091728 | 234.882091  | -2.5095 | 7.62E-05 | 0.021455  | 5Rik      | chr1  | _gene                                                                    |
| ENSMUSG00 |             |             |         |          |           |           |       |                                                                          |
| 000026586 | 246.9122526 | 800.4488124 | 1.5339  | 9.47E-05 | 0.024522  | Prrx1     | chr1  | paired_related_homeobox_1                                                |
| ENSMUSG00 |             |             |         |          |           |           |       |                                                                          |
| 000026586 | 9.760283266 | 101.3868182 | 2.2964  | 0.000190 | 0.040763  | Tnn       | chr1  | tenascin_N                                                               |



|                        |             |             |         |                |                |         |      |                                                                                                          |
|------------------------|-------------|-------------|---------|----------------|----------------|---------|------|----------------------------------------------------------------------------------------------------------|
| 000026725              |             |             |         | 4              |                |         |      |                                                                                                          |
| ENSMUSG00<br>000027463 | 77.04624868 | 314.1877113 | 1.7462  | 0.000150<br>6  | 0.035561       | Slc52a3 | chr2 | solute_carrier_protein_famil<br>y_52_member_3                                                            |
| ENSMUSG00<br>000027559 | 414.4916034 | 10.0603722  | -3.2926 | 2.16E-07       | 0.0002888<br>9 | Car3    | chr3 | carbonic_anhydrase_3                                                                                     |
| ENSMUSG00<br>000030022 | 1936.508135 | 532.8993384 | -1.6589 | 6.48E-05       | 0.019579       | Adamts9 | chr6 | a_disintegrin-like_and_metal<br>lopeptidase_(reprolysin_typ<br>e)_with_thrombospondin_ty<br>pe_1_motif_9 |
| ENSMUSG00<br>000030110 | 16.81106862 | 91.39934081 | 1.9615  | 0.000199<br>07 | 0.041513       | Ret     | chr6 | ret_proto-oncogene                                                                                       |
| ENSMUSG00<br>000030200 | 928.6676251 | 105.0267708 | -2.4657 | 6.24E-06       | 0.0040084      | Bcl2l14 | chr6 | BCL2-like_14_(apoptosis_fa<br>cilitator)                                                                 |
| ENSMUSG00<br>000030222 | 431.1318791 | 88.53535083 | -1.943  | 4.21E-05       | 0.015178       | Rerg    | chr6 | RAS-like_estrogen-regulate<br>d_growth-inhibitor                                                         |
| ENSMUSG00<br>000030399 | 260.6974218 | 2.125020642 | -3.9834 | 3.51E-10       | 9.40E-07       | Ckm     | chr7 | creatine_kinase_muscle                                                                                   |
| ENSMUSG00<br>000030510 | 121.560908  | 18.41376929 | -2.2381 | 1.03E-05       | 0.0051501      | Cers3   | chr7 | ceramide_synthase_3                                                                                      |
| ENSMUSG00<br>000030672 | 473.1342088 | 18.13061124 | -3.0574 | 1.00E-06       | 0.0009457<br>5 | Mylpf   | chr7 | myosin_light_chain_phosph<br>orylatable_fast_skeletal_mu<br>scl                                          |
| ENSMUSG00<br>000030730 | 633.0854991 | 18.64109335 | -3.2876 | 1.42E-07       | 0.0002075<br>6 | Atp2a1  | chr7 | ATPase_Ca++_transporting<br>_cardiac_muscle_fast_twitc<br>h_1                                            |
| ENSMUSG00<br>000031626 | 3890.371794 | 1100.720875 | -1.6389 | 4.25E-05       | 0.015178       | Sorbs2  | chr8 | sorbin_and_SH3_domain_c<br>ontaining_2                                                                   |
| ENSMUSG00<br>000031972 | 1956.227592 | 5.9452184   | -4.5047 | 1.71E-12       | 5.50E-09       | Acta1   | chr8 | actin_alpha_1_skeletal_mus<br>cle                                                                        |
| ENSMUSG00              | 43.51294258 | 264.5311495 | 2.026   | 0.000246       | 0.049549       | Ptgs2   | chr1 | prostaglandin-endoperoxide                                                                               |

|           |             |             |         |          |           |           |       |  |                                                             |
|-----------|-------------|-------------|---------|----------|-----------|-----------|-------|--|-------------------------------------------------------------|
| 000032487 |             |             |         | 86       |           |           |       |  | _synthase_2                                                 |
| ENSMUSG00 |             |             |         |          |           |           |       |  | myosin_heavy_polypeptide_2_skeletal_muscle_adult            |
| 000033196 | 96.04742938 | 0.345248056 | -2.9314 | 1.07E-05 | 0.0051905 | Myh2      | chr11 |  |                                                             |
| ENSMUSG00 |             |             |         |          |           |           |       |  | homeobox_C9                                                 |
| 000036139 | 11.60877588 | 125.5014975 | 2.5452  | 1.01E-05 | 0.0051501 | Hoxc9     | chr15 |  |                                                             |
| ENSMUSG00 |             |             |         |          |           |           |       |  | nephroblastoma_overexpressed_gene                           |
| 000037362 | 26.2393884  | 218.6582485 | 2.34    | 3.13E-05 | 0.012258  | Nov       | chr15 |  |                                                             |
| ENSMUSG00 |             |             |         | 0.000188 |           | 1110007C0 |       |  | RIKEN_cDNA_1110007C09                                       |
| 000037960 | 481.0879019 | 1627.809767 | 1.5634  | 01       | 0.040763  | 9Rik      | chr13 |  | _gene                                                       |
| ENSMUSG00 |             |             |         |          |           |           |       |  | myosin_binding_protein_C_fast-type                          |
| 000038670 | 469.7441164 | 36.65250186 | -2.9114 | 6.13E-08 | 9.84E-05  | Mybpc2    | chr7  |  |                                                             |
| ENSMUSG00 |             |             |         |          |           |           |       |  | whirlin                                                     |
| 000039137 | 124.2125776 | 1040.412652 | 2.5997  | 5.26E-08 | 9.38E-05  | Whrn      | chr4  |  |                                                             |
| ENSMUSG00 |             |             |         | 0.000131 |           |           |       |  | DAZ_interacting_protein_1                                   |
| 000042156 | 192.2499112 | 49.98051525 | -1.6952 | 57       | 0.033009  | Dzip1     | chr14 |  |                                                             |
| ENSMUSG00 |             |             |         |          | 0.0009315 |           |       |  | matrix_metalloproteinase_3                                  |
| 000043613 | 76.13595914 | 1264.529018 | 2.9152  | 8.70E-07 | 7         | Mmp3      | chr9  |  |                                                             |
| ENSMUSG00 |             |             |         | 0.000113 |           |           |       |  | LSM8_homolog_U6_small_nuclear_RNA_associated_(S_cerevisiae) |
| 000044155 | 1052.36644  | 14380.93829 | 2.4371  | 15       | 0.028839  | Lsm8      | chr6  |  |                                                             |
| ENSMUSG00 |             |             |         |          | 0.0009075 |           |       |  | small_nucleolar_RNA_host_gene_11                            |
| 000044349 | 1904.015011 | 78.04641385 | -3.061  | 7.91E-07 | 8         | Snhg11    | chr2  |  |                                                             |
| ENSMUSG00 |             |             |         |          |           |           |       |  | complement_component_1_q_subcomponent-like_1                |
| 000045532 | 10.04215269 | 62.55217387 | 2.1515  | 2.84E-05 | 0.011703  | C1ql1     | chr11 |  |                                                             |
| ENSMUSG00 |             |             |         |          |           |           |       |  | nebulin-related_anchoring_protein                           |
| 000049134 | 146.9349053 | 6.227319725 | -2.905  | 3.92E-06 | 0.003146  | Nrap      | chr19 |  |                                                             |
| ENSMUSG00 |             |             |         |          | 0.0009457 |           |       |  | matrix_metalloproteinase_12                                 |
| 000049723 | 224.0177778 | 2771.080596 | 2.7619  | 9.87E-07 | 5         | Mmp12     | chr9  |  |                                                             |
| ENSMUSG00 |             |             |         | 0.000139 |           |           |       |  | matrix_metalloproteinase_13                                 |
| 000050578 | 263.0220625 | 3088.69546  | 2.372   | 03       | 0.03332   | Mmp13     | chr9  |  |                                                             |

|                        |             |             |         |           |           |           |       |                                                              |
|------------------------|-------------|-------------|---------|-----------|-----------|-----------|-------|--------------------------------------------------------------|
| ENSMUSG00<br>000052135 | 102.4260603 | 761.3440225 | 2.3192  | 1.20E-05  | 0.0056792 | Foxo6     | chr4  | forkhead_box_O6                                              |
| ENSMUSG00<br>000054753 | 58.9555992  | 402.4078268 | 2.2273  | 2.44E-05  | 0.010424  | AU018091  | chr7  | expressed_sequence_AU018091                                  |
| ENSMUSG00<br>000056328 | 192.907765  | 5.680797164 | -2.6982 | 4.08E-05  | 0.015178  | Myh1      | chr11 | myosin_heavy_polypeptide_1_skeletal_muscle_adult             |
| ENSMUSG00<br>000056895 | 0.602267229 | 44.26661411 | 3.1516  | 1.23E-06  | 0.0010373 | Hist3h2ba | chr11 | histone_cluster_3_H2ba                                       |
| ENSMUSG00<br>000057003 | 1697.048389 | 2.053468115 | -4.9215 | 9.41E-15  | 9.46E-11  | Myh4      | chr11 | myosin_heavy_polypeptide_4_skeletal_muscle                   |
| ENSMUSG00<br>000057967 | 0.377572761 | 24.56331425 | 2.6816  | 5.10E-05  | 0.01743   | Fgf18     | chr11 | fibroblast_growth_factor_18                                  |
| ENSMUSG00<br>000058740 | 0           | 40.29814579 | 2.9471  | 9.45E-06  | 0.0051501 | Kcnt1     | chr2  | potassium_channel_subfamily_T_member_1                       |
| ENSMUSG00<br>000059412 | 12.48275609 | 174.703999  | 2.4763  | 7.97E-05  | 0.021695  | Fxyd2     | chr9  | FXD1 domain-containing ion transport regulator_2             |
| ENSMUSG00<br>000060548 | 420.1201105 | 74.29550326 | -2.0415 | 7.27E-05  | 0.021093  | Tnfrsf19  | chr14 | tumor_necrosis_factor_receptor_superfamily_member_19         |
| ENSMUSG00<br>000060981 | 42.2553062  | 308.2381984 | 2.3984  | 1.14E-06  | 0.0010168 | Hist1h4h  | chr13 | histone_cluster_1_H4h                                        |
| ENSMUSG00<br>000061462 | 104.5190405 | 7.09730147  | -2.497  | 7.36E-05  | 0.021093  | Obscn     | chr11 | obscurin_cytoskeletal_caldesmon_and_titin-interacting_RhoGEF |
| ENSMUSG00<br>000061718 | 453.7611861 | 96.12195317 | -1.8652 | 0.0001682 | 0.039143  | Ppp1r1b   | chr11 | protein_phosphatase_1_regulatory_(inhibitor)_subunit_1B      |
| ENSMUSG00<br>000061723 | 721.6822142 | 17.51234792 | -3.4896 | 1.97E-08  | 3.95E-05  | Tnnt3     | chr7  | troponin_T3_skeletal_fast                                    |
| ENSMUSG00<br>000061728 | 307.6309278 | 0.313844758 | -4.855  | 1.18E-14  | 9.46E-11  | Myl1      | chr1  | myosin_light_polypeptide_1                                   |

|                        |             |             |         |                |           |                   |       |                                                    |
|------------------------|-------------|-------------|---------|----------------|-----------|-------------------|-------|----------------------------------------------------|
| 000061816              |             |             |         |                |           |                   |       |                                                    |
| ENSMUSG00<br>000064325 | 0.292936353 | 66.34815634 | 2.683   | 5.74E-05       | 0.018817  | Hhip              | chr8  | Hedgehog-interacting_protein                       |
| ENSMUSG00<br>000068697 | 57.51856656 | 3.084575137 | -2.6619 | 2.47E-05       | 0.010424  | Myoz1             | chr14 | myozenin_1                                         |
| ENSMUSG00<br>000069267 | 2.151585404 | 35.12836826 | 2.4372  | 0.000137<br>56 | 0.03332   | Hist1h3b          | chr13 | histone_cluster_1_H3b                              |
| ENSMUSG00<br>000069793 | 428.8851915 | 102.0452216 | -1.8509 | 6.83E-06       | 0.0040604 | Slfn9             | chr11 | schlafen_9                                         |
| ENSMUSG00<br>000070469 | 6.529580245 | 82.36781028 | 2.4348  | 8.92E-05       | 0.023865  | Adamtsl3          | chr7  | ADAMTS-like_3                                      |
| ENSMUSG00<br>000072941 | 133.8028669 | 1714.567047 | 2.6342  | 9.86E-06       | 0.0051501 | Sod3              | chr5  | superoxide_dismutase_3_extracellular               |
| ENSMUSG00<br>000079092 | 21.61231318 | 756.7934819 | 2.9544  | 5.18E-06       | 0.0035771 | Pri2c2            | chr13 | prolactin_family_2_subfamily_c_member_2            |
| ENSMUSG00<br>000084141 | 16.18133994 | 122.5912608 | 2.2149  | 9.41E-05       | 0.024522  | Olf1372-ps<br>1   | chr11 | olfactory_receptor_1372_pseudogene_1               |
| ENSMUSG00<br>000085440 | 27.19085645 | 2.394079024 | -2.3439 | 0.000137<br>79 | 0.03332   | Sorbs2os          | chr8  | sorbin_and_SH3_domain_containing_2_opposite_strand |
| ENSMUSG00<br>000087075 | 162.7810845 | 5.160172257 | -2.8303 | 1.32E-05       | 0.0060529 | A230065H1<br>6Rik | chr12 | RIKEN_cDNA_A230065H16_gene                         |
| ENSMUSG00<br>000090125 | 5.414166977 | 68.16322815 | 2.5146  | 3.51E-05       | 0.01341   | Pou3f1            | chr4  | POU_domain_class_3_transcription_factor_1          |
| ENSMUSG00<br>000096847 | 4.414358175 | 44.29455257 | 2.2901  | 0.000176<br>09 | 0.039824  | Tmem151b          | chr17 | transmembrane_protein_151B                         |

Table S3. Differentially expressed genes in the tumor between saline and NanoTLZ groups

| Gene_ID                | Saline      | NanoTLZ     | log2Fold<br>Change | pvalue         | padj          | GeneName          | Chrom | GeneDescription                                            |
|------------------------|-------------|-------------|--------------------|----------------|---------------|-------------------|-------|------------------------------------------------------------|
| ENSMUSG0<br>0000000120 | 29.45828816 | 532.0126907 | 3.2297             | 2.44E-10       | 6.51E-07      | Ngfr              | chr11 | nerve_growth_factor_receptor_(TNFR_superfamily_member_16)  |
| ENSMUSG0<br>0000000861 | 1026.029208 | 127.3403145 | -2.1255            | 0.000142<br>93 | 0.023416      | Bcl11a            | chr11 | B_cell_CLL/lymphoma_11A_(zinc_finger_protein)              |
| ENSMUSG0<br>0000001281 | 44.65153949 | 142.0003496 | 1.4818             | 0.000128<br>75 | 0.022469      | Itgb7             | chr15 | integrin_beta_7                                            |
| ENSMUSG0<br>0000002105 | 498.0506683 | 1367.228011 | 1.3191             | 0.000264<br>96 | 0.035157      | Slc39a13          | chr2  | solute_carrier_family_39_(metal_ion_transporter)_member_13 |
| ENSMUSG0<br>0000004360 | 72.81831316 | 1.273701469 | -2.2062            | 0.000350<br>05 | 0.041022      | 9330159F19<br>Rik | chr10 | RIKEN_cDNA_9330159F19_gene                                 |
| ENSMUSG0<br>0000005716 | 232.9190197 | 0           | -4.7377            | 6.38E-16       | 5.12E-12      | Pvalb             | chr15 | parvalbumin                                                |
| ENSMUSG0<br>0000006398 | 1774.195258 | 750.2606927 | -1.1529            | 0.000292       | 0.037504      | Cdc20             | chr4  | cell_division_cycle_20                                     |
| ENSMUSG0<br>0000006457 | 369.0773943 | 3.06205181  | -4.1398            | 1.03E-12       | 3.31E-09      | Actn3             | chr19 | actinin_alpha_3                                            |
| ENSMUSG0<br>0000007908 | 261.7911664 | 19.8122058  | -2.5038            | 1.23E-05       | 0.004105<br>6 | Hmgcll1           | chr9  | 3-hydroxymethyl-3-methylglutaryl-Coenzyme_A_lyase-like_1   |
| ENSMUSG0               | 17.24660109 | 187.0411487 | 2.2715             | 8.65E-05       | 0.017355      | Syn2              | chr6  | synapsin_II                                                |





|                        |             |             |         |                |               |                   |       |                                                             |
|------------------------|-------------|-------------|---------|----------------|---------------|-------------------|-------|-------------------------------------------------------------|
| ENSMUSG0<br>0000022543 | 120.9908705 | 25.11770295 | -1.8416 | 0.000130<br>69 | 0.022562      | 4930451G09<br>Rik | chr16 | RIKEN_cDNA_4930<br>451G09_gene                              |
| ENSMUSG0<br>0000024365 | 8.696754759 | 166.7797645 | 2.6043  | 1.15E-05       | 0.004067<br>6 | Cyp21a1           | chr17 | cytochrome_P450_f<br>amily_21_subfamily<br>_a_polypeptide_1 |
| ENSMUSG0<br>0000024471 | 47.62694406 | 0           | -2.7276 | 9.96E-06       | 0.003719<br>8 | Myot              | chr18 | myotilin                                                    |
| ENSMUSG0<br>0000024803 | 167.395022  | 892.6299439 | 1.8852  | 0.000213<br>14 | 0.030553      | Ankrd1            | chr19 | ankyrin_repeat_do<br>main_1_(cardiac_m<br>uscle)            |
| ENSMUSG0<br>0000025347 | 1.850421602 | 31.81115614 | 2.3991  | 5.70E-05       | 0.013468      | Mettl7b           | chr10 | methyltransferase_li<br>ke_7B                               |
| ENSMUSG0<br>0000025665 | 319.9564552 | 10.88944275 | -2.4425 | 6.93E-05       | 0.014841      | Rps6ka6           | chrX  | ribosomal_protein_<br>S6_kinase_polypept<br>ide_6           |
| ENSMUSG0<br>0000025875 | 335.1941503 | 1093.408115 | 1.5127  | 0.000111<br>28 | 0.020422      | Tspan17           | chr13 | tetraspanin_17                                              |
| ENSMUSG0<br>0000026308 | 61.78627977 | 200.4399705 | 1.4842  | 0.000300<br>69 | 0.037775      | Klhl30            | chr1  | kelch-like_30                                               |
| ENSMUSG0<br>0000026471 | 424.0871358 | 133.6658782 | -1.4893 | 9.03E-05       | 0.017907      | Mr1               | chr1  | major_histocompati<br>bility_complex_clas<br>s_I-related    |
| ENSMUSG0<br>0000026475 | 644.0500811 | 3957.081119 | 1.9196  | 0.000417<br>43 | 0.046329      | Rgs16             | chr1  | regulator_of_G-prot<br>ein_signaling_16                     |
| ENSMUSG0<br>0000026725 | 9.816735293 | 74.11143699 | 2.248   | 1.21E-05       | 0.004105<br>6 | Tnn               | chr1  | tenascin_N                                                  |
| ENSMUSG0<br>0000027913 | 1.79406282  | 29.57491139 | 2.1809  | 0.000331<br>9  | 0.039595      | Crct1             | chr3  | cysteine-rich_C-ter<br>minal_1                              |
| ENSMUSG0<br>0000027962 | 86.8273693  | 489.9251045 | 2.1196  | 1.48E-06       | 0.000847<br>7 | Vcam1             | chr3  | vascular_cell_adhe<br>sion_molecule_1                       |



|                        |             |             |         |                |                |         |      |                                                          |
|------------------------|-------------|-------------|---------|----------------|----------------|---------|------|----------------------------------------------------------|
| ENSMUSG0<br>0000028020 | 135.5809621 | 8.226358435 | -2.2803 | 0.000168<br>61 | 0.025299       | Glrb    | chr3 | glycine_receptor_beta_subunit                            |
| ENSMUSG0<br>0000028464 | 2013.633211 | 745.1549172 | -1.2963 | 0.000368<br>43 | 0.042251       | Tpm2    | chr4 | tropomyosin_2_beta                                       |
| ENSMUSG0<br>0000028600 | 24.04628903 | 97.89666234 | 1.7407  | 4.77E-05       | 0.012185       | Podn    | chr4 | podocan                                                  |
| ENSMUSG0<br>0000028678 | 765.4908167 | 308.2762706 | -1.2274 | 5.32E-05       | 0.012742       | Kif2c   | chr4 | kinesin_family_member_2C                                 |
| ENSMUSG0<br>0000029755 | 1.79406282  | 58.95269419 | 2.1848  | 0.000402       | 0.045134       | Dlx5    | chr6 | distal-less_homeobox_5                                   |
| ENSMUSG0<br>0000029816 | 81.33684347 | 619.1406188 | 2.4709  | 3.21E-08       | 3.68E-05       | Gpnmb   | chr6 | glycoprotein_(transmembrane)_nmb                         |
| ENSMUSG0<br>0000030200 | 937.9033169 | 146.2139676 | -2.1505 | 1.15E-05       | 0.004067<br>6  | Bcl2l14 | chr6 | BCL2-like_14_(apoptosis_facilitator)                     |
| ENSMUSG0<br>0000030222 | 434.9175414 | 105.30581   | -1.7824 | 1.66E-05       | 0.005212       | Rerg    | chr6 | RAS-like_estrogen-regulated_growth_inhibitor             |
| ENSMUSG0<br>0000030399 | 263.3920531 | 0.661106986 | -4.2996 | 3.73E-13       | 1.50E-09       | Ckm     | chr7 | creatine_kinase_muscle                                   |
| ENSMUSG0<br>0000030607 | 95.94046441 | 2939.06666  | 3.1758  | 4.58E-08       | 4.90E-05       | Acan    | chr7 | aggrecan                                                 |
| ENSMUSG0<br>0000030672 | 478.4583843 | 18.42826445 | -2.9206 | 7.02E-07       | 0.000536<br>91 | Mylpf   | chr7 | myosin_light_chain_phosphorylatable_fast_skeletal_muscle |
| ENSMUSG0<br>0000030730 | 639.9107707 | 15.59338679 | -3.5288 | 6.82E-10       | 1.22E-06       | Atp2a1  | chr7 | ATPase_Ca++_transporting_cardiac_muscle_fast_twitch_1    |
| ENSMUSG0<br>0000030761 | 180.161366  | 567.7877463 | 1.4857  | 7.36E-05       | 0.015345       | Myo7a   | chr7 | myosin_VIIA                                              |
| ENSMUSG0<br>0000030761 | 187.9368911 | 13.80628934 | -2.2785 | 0.000136       | 0.022763       | Slc6a14 | chrX | solute_carrier_family                                    |

|                        |             |             |         |                |                |         |       |                                                     |
|------------------------|-------------|-------------|---------|----------------|----------------|---------|-------|-----------------------------------------------------|
| 0000031089             |             |             |         | 11             |                |         |       | y_6_(neurotransmitter_transporter)_member_14        |
| ENSMUSG0<br>0000031289 | 5.487602326 | 34.20448597 | 1.9656  | 0.000215<br>72 | 0.030649       | Il13ra2 | chrX  | interleukin_13_receptor_alpha_2                     |
| ENSMUSG0<br>0000031626 | 3921.094373 | 1464.661684 | -1.3129 | 5.95E-05       | 0.013833       | Sorbs2  | chr8  | sorbin_and_SH3_domain_containing_2                  |
| ENSMUSG0<br>0000031740 | 566.3385029 | 1878.309068 | 1.4963  | 0.000389<br>64 | 0.044054       | Mmp2    | chr8  | matrix_metalloproteinase_2                          |
| ENSMUSG0<br>0000031841 | 170.3074118 | 1004.152138 | 1.9843  | 0.000111<br>77 | 0.020422       | Cdh13   | chr8  | cadherin_13                                         |
| ENSMUSG0<br>0000032358 | 133.9768513 | 8.376242933 | -2.257  | 0.000197<br>12 | 0.02896        | Fam83b  | chr9  | family_with_sequence_similarity_83_member_B         |
| ENSMUSG0<br>0000032925 | 14.89280888 | 75.18239447 | 1.8826  | 0.000118<br>14 | 0.021312       | Itgbl1  | chr14 | integrin_beta-like_1                                |
| ENSMUSG0<br>0000033590 | 171.6278009 | 17.90926859 | -2.174  | 0.000162<br>32 | 0.024819       | Myo5c   | chr9  | myosin_VC                                           |
| ENSMUSG0<br>0000034463 | 884.2046717 | 283.8636042 | -1.4583 | 0.000164<br>04 | 0.024847       | Scara3  | chr14 | scavenger_receptor_class_A_member_3                 |
| ENSMUSG0<br>0000034675 | 572.9488153 | 2902.278924 | 2.0369  | 8.83E-07       | 0.000616<br>54 | Dbn1    | chr13 | drebrin_1                                           |
| ENSMUSG0<br>0000035385 | 110.9264937 | 555.1662422 | 1.9202  | 3.78E-05       | 0.010293       | Ccl2    | chr11 | chemokine_(C-C_chemokine)_ligand_2                  |
| ENSMUSG0<br>0000036523 | 7.136209348 | 100.9474226 | 2.4625  | 2.46E-05       | 0.007320<br>1  | Greb1   | chr12 | gene_regulated_by_estrogen_in_breast_cancer_protein |
| ENSMUSG0<br>0000036585 | 29.89988844 | 110.1666045 | 1.631   | 8.54E-05       | 0.017354       | Fgf1    | chr18 | fibroblast_growth_factor_1                          |

|                        |             |             |         |                |               |          |       |                                                                                                 |
|------------------------|-------------|-------------|---------|----------------|---------------|----------|-------|-------------------------------------------------------------------------------------------------|
| ENSMUSG0<br>0000036832 | 940.1916061 | 78.89586243 | -2.4691 | 1.25E-05       | 0.004105<br>6 | Lpar3    | chr3  | lysophosphatidic_ac<br>id_receptor_3                                                            |
| ENSMUSG0<br>0000037129 | 563.4008298 | 116.3649799 | -1.7973 | 0.000341<br>3  | 0.040292      | Tmprss13 | chr9  | transmembrane_pro<br>tease_serine_13                                                            |
| ENSMUSG0<br>0000037139 | 38.75199526 | 2.403118319 | -2.1519 | 0.000418<br>42 | 0.046329      | Myom3    | chr4  | myomesin_family_<br>member_3                                                                    |
| ENSMUSG0<br>0000037610 | 80.19701859 | 12.21508311 | -2.1036 | 3.96E-05       | 0.010607      | Kcnmb2   | chr3  | potassium_large_co<br>nductance_calcium-<br>activated_channel_<br>subfamily_M_beta_<br>member_2 |
| ENSMUSG0<br>0000037852 | 2473.241903 | 11572.39564 | 1.7843  | 0.000283<br>08 | 0.036652      | Cpe      | chr8  | carboxypeptidase_<br>E                                                                          |
| ENSMUSG0<br>0000038077 | 16.18865176 | 179.2384522 | 2.2958  | 7.14E-05       | 0.015092      | Kcna6    | chr6  | potassium_voltage-<br>gated_channel_sha<br>ker-related_subfami<br>ly_member_6                   |
| ENSMUSG0<br>0000038239 | 39.44669237 | 3.382650672 | -2.2931 | 7.77E-05       | 0.015994      | Hrc      | chr7  | histidine_rich_calciu<br>m_binding_protein                                                      |
| ENSMUSG0<br>0000038521 | 127.5887876 | 630.4394769 | 1.9431  | 1.47E-05       | 0.004714<br>8 | C1s1     | chr6  | complement_compo<br>nent_1_s_subcomp<br>onent_1                                                 |
| ENSMUSG0<br>0000038670 | 474.2706529 | 39.3228014  | -2.8603 | 6.75E-09       | 1.08E-05      | Mybpc2   | chr7  | myosin_binding_pro<br>tein_C_fast-type                                                          |
| ENSMUSG0<br>0000038916 | 79.6416917  | 1.715581588 | -2.3122 | 0.000180<br>68 | 0.026859      | Soga3    | chr10 | SOGA_family_mem<br>ber_3                                                                        |
| ENSMUSG0<br>0000039084 | 66.10132305 | 234.6937098 | 1.6522  | 6.01E-06       | 0.002681<br>2 | Chad     | chr11 | chondroadherin                                                                                  |
| ENSMUSG0<br>0000039137 | 124.9576517 | 456.3736392 | 1.5836  | 0.000361<br>07 | 0.042007      | Whrn     | chr4  | whirlin                                                                                         |

|                        |             |             |         |                |                |         |       |                                                                      |
|------------------------|-------------|-------------|---------|----------------|----------------|---------|-------|----------------------------------------------------------------------|
| ENSMUSG0<br>0000039697 | 837.1920821 | 245.800906  | -1.6229 | 1.73E-06       | 0.000926<br>32 | Ncoa7   | chr10 | nuclear_receptor_c<br>oactivator_7                                   |
| ENSMUSG0<br>0000040021 | 2016.584894 | 726.6046803 | -1.3294 | 0.000280<br>81 | 0.036652       | Lats1   | chr10 | large_tumor_suppre<br>ssor                                           |
| ENSMUSG0<br>0000040649 | 9.702125571 | 201.976701  | 2.3776  | 9.51E-05       | 0.018404       | Rimklb  | chr6  | ribosomal_modificat<br>ion_protein_rimK-lik<br>e_family_member_<br>B |
| ENSMUSG0<br>0000041202 | 7.945437999 | 76.7305963  | 2.2241  | 9.23E-05       | 0.018063       | Pla2g2d | chr4  | phospholipase_A2_<br>group_IID                                       |
| ENSMUSG0<br>0000042099 | 133.9238465 | 448.0564936 | 1.4999  | 0.000439<br>56 | 0.048008       | Kank3   | chr17 | KN_motif_and_anky<br>rin_repeat_domains<br>_3                        |
| ENSMUSG0<br>0000042357 | 72.02547953 | 8.686894926 | -2.1447 | 0.000121<br>43 | 0.021661       | Gjb5    | chr4  | gap_junction_protei<br>n_beta_5                                      |
| ENSMUSG0<br>0000042363 | 3405.207771 | 720.1961864 | -1.8266 | 0.000134<br>81 | 0.022763       | Lgalsl  | chr11 | lectin_galactoside_<br>binding-like                                  |
| ENSMUSG0<br>0000042401 | 3.126763242 | 45.14746831 | 2.4863  | 1.85E-05       | 0.005610<br>7  | Crtac1  | chr19 | cartilage_acidic_pro<br>tein_1                                       |
| ENSMUSG0<br>0000042428 | 143.2845873 | 1093.355885 | 2.443   | 9.74E-08       | 9.78E-05       | Mgat3   | chr15 | mannoside_acetylgl<br>ucosaminyltransfera<br>se_3                    |
| ENSMUSG0<br>0000043613 | 76.5570707  | 2125.40235  | 3.225   | 1.50E-08       | 2.01E-05       | Mmp3    | chr9  | matrix_metallopepti<br>dase_3                                        |
| ENSMUSG0<br>0000044006 | 11.77334934 | 313.2964969 | 2.9854  | 3.35E-07       | 0.000268<br>71 | Cilp2   | chr8  | cartilage_intermedia<br>te_layer_protein_2                           |
| ENSMUSG0<br>0000044043 | 21.60932905 | 97.28095823 | 1.8844  | 7.14E-06       | 0.002938<br>5  | Pcdhb14 | chr18 | protocadherin_beta<br>_14                                            |
| ENSMUSG0<br>0000044155 | 1061.809099 | 15689.09807 | 2.4092  | 4.86E-05       | 0.012185       | Lsm8    | chr6  | LSM8_homolog_U6<br>_small_nuclear_RN                                 |

|                        |             |             |         |                |                |         |       |                                                                         |
|------------------------|-------------|-------------|---------|----------------|----------------|---------|-------|-------------------------------------------------------------------------|
|                        |             |             |         |                |                |         |       | A_associated_(S_c<br>erevisiae)                                         |
| ENSMUSG0<br>0000044338 | 146.3166592 | 370.3737678 | 1.2338  | 0.000201<br>72 | 0.029177       | Aplnr   | chr2  | apelin_receptor                                                         |
| ENSMUSG0<br>0000044708 | 57.94101212 | 294.3848265 | 1.9076  | 6.83E-05       | 0.014815       | Kcnj10  | chr1  | potassium_inwardly<br>-rectifying_channel_<br>subfamily_J_memb<br>er_10 |
| ENSMUSG0<br>0000045699 | 27.99481751 | 1.972279579 | -2.3033 | 9.95E-05       | 0.019023       | Gm21411 | chr4  | predicted_gene_21<br>411                                                |
| ENSMUSG0<br>0000047104 | 35.75493643 | 231.1461244 | 2.0254  | 0.000133<br>79 | 0.022763       | Pbp2    | chr6  | phosphatidylethanol<br>amine_binding_prot<br>ein_2                      |
| ENSMUSG0<br>0000047420 | 69.70405608 | 314.1737529 | 1.9553  | 1.20E-07       | 0.000113<br>12 | Fam180a | chr6  | family_with_sequen<br>ce_similarity_180_<br>member_A                    |
| ENSMUSG0<br>0000047562 | 33.22097986 | 710.1543941 | 2.6766  | 6.89E-06       | 0.002909<br>3  | Mmp10   | chr9  | matrix_metallopepti<br>dase_10                                          |
| ENSMUSG0<br>0000049134 | 148.5864918 | 5.845322873 | -2.847  | 1.46E-06       | 0.000847<br>7  | Nrap    | chr19 | nebulin-related_anc<br>horing_protein                                   |
| ENSMUSG0<br>0000049723 | 225.2702745 | 2220.417544 | 2.4477  | 5.13E-06       | 0.002354<br>8  | Mmp12   | chr9  | matrix_metallopepti<br>dase_12                                          |
| ENSMUSG0<br>0000050234 | 94.64033167 | 323.1390031 | 1.6229  | 1.99E-06       | 0.000999<br>05 | Gja4    | chr4  | gap_junction_protei<br>n_alpha_4                                        |
| ENSMUSG0<br>0000050578 | 264.4834413 | 8173.387398 | 3.4905  | 2.84E-10       | 6.51E-07       | Mmp13   | chr9  | matrix_metallopepti<br>dase_13                                          |
| ENSMUSG0<br>0000050808 | 1652.289958 | 393.8291786 | -1.7781 | 3.34E-05       | 0.009414<br>8  | Muc15   | chr2  | mucin_15                                                                |
| ENSMUSG0<br>0000052305 | 380.8432827 | 41.33505788 | -2.5021 | 8.21E-07       | 0.000598<br>86 | Hbb-bs  | chr7  | hemoglobin_beta_a<br>dult_s_chain                                       |

|                        |             |             |         |                |               |          |       |                                                                           |
|------------------------|-------------|-------------|---------|----------------|---------------|----------|-------|---------------------------------------------------------------------------|
| ENSMUSG0<br>0000053552 | 22.97046569 | 158.9990138 | 1.9909  | 0.000329<br>7  | 0.039595      | Ebf4     | chr2  | early_B_cell_factor<br>_4                                                 |
| ENSMUSG0<br>0000056290 | 16.20111018 | 80.14673444 | 1.8239  | 0.000272<br>37 | 0.035844      | Ms4a4b   | chr19 | membrane-spanning<br>_4-domains_subfa<br>mily_A_member_4B                 |
| ENSMUSG0<br>0000056328 | 195.1307524 | 5.515856127 | -2.9008 | 1.43E-06       | 0.000847<br>7 | Myh1     | chr11 | myosin_heavy_poly<br>peptide_1_skeletal_<br>muscle_adult                  |
| ENSMUSG0<br>0000057074 | 1.897845406 | 64.30735876 | 2.7123  | 7.81E-06       | 0.003133<br>3 | Ces1g    | chr8  | carboxylesterase_1<br>G                                                   |
| ENSMUSG0<br>0000058446 | 5304.139002 | 1677.485465 | -1.4755 | 0.000146<br>46 | 0.023514      | Znrf2    | chr6  | zinc_and_ring_finge<br>r_2                                                |
| ENSMUSG0<br>0000059336 | 3.043856349 | 33.12808699 | 2.2439  | 0.000107<br>18 | 0.020245      | Slc14a1  | chr18 | solute_carrier_famil<br>y_14_(urea_transpo<br>rter)_member_1              |
| ENSMUSG0<br>0000060548 | 423.7727386 | 102.1408321 | -1.7612 | 4.21E-05       | 0.011071      | Tnfrsf19 | chr14 | tumor_necrosis_fact<br>or_receptor_superfa<br>mily_member_19              |
| ENSMUSG0<br>0000060639 | 116.2504129 | 507.4778327 | 1.7918  | 6.81E-05       | 0.014815      | Hist1h4i | chr13 | histone_cluster_1_<br>H4i                                                 |
| ENSMUSG0<br>0000060981 | 42.54869512 | 423.2573868 | 2.7887  | 5.82E-10       | 1.17E-06      | Hist1h4h | chr13 | histone_cluster_1_<br>H4h                                                 |
| ENSMUSG0<br>0000061048 | 897.1867682 | 49.32413692 | -2.2513 | 0.000229<br>5  | 0.031763      | Cdh3     | chr8  | cadherin_3                                                                |
| ENSMUSG0<br>0000061353 | 95.67010567 | 419.1521158 | 1.8706  | 3.70E-06       | 0.001746<br>6 | Cxcl12   | chr6  | chemokine_(C-X-C<br>_motif)_ligand_12                                     |
| ENSMUSG0<br>0000061462 | 105.6346548 | 9.776667158 | -2.1757 | 0.000219<br>06 | 0.030851      | Obscn    | chr11 | obscurin_cytoskelet<br>al_calmodulin_and_<br>titin-interacting_Rho<br>GEF |

|                        |             |             |         |                |                |          |       |                                                  |
|------------------------|-------------|-------------|---------|----------------|----------------|----------|-------|--------------------------------------------------|
| ENSMUSG0<br>0000061723 | 729.444135  | 25.32898253 | -3.2152 | 1.98E-08       | 2.44E-05       | Tnnt3    | chr7  | troponin_T3_skelet<br>al_fast                    |
| ENSMUSG0<br>0000061816 | 310.9525939 | 2.314961198 | -4.225  | 2.87E-13       | 1.50E-09       | Myl1     | chr1  | myosin_light_polyp<br>eptide_1                   |
| ENSMUSG0<br>0000064288 | 22.49879791 | 102.0335887 | 1.769   | 0.000262<br>94 | 0.035157       | Hist1h4k | chr13 | histone_cluster_1_<br>H4k                        |
| ENSMUSG0<br>0000067149 | 20.11055396 | 236.6367132 | 2.257   | 0.000125<br>56 | 0.022152       | Igj      | chr5  | immunoglobulin_joi<br>ning_chain                 |
| ENSMUSG0<br>0000068245 | 160.7105701 | 40.38814347 | -1.6874 | 0.000148<br>22 | 0.023561       | Phf11d   | chr14 | PHD_finger_protein<br>_11D                       |
| ENSMUSG0<br>0000068697 | 58.11149334 | 1.691325336 | -2.9015 | 1.15E-06       | 0.000772<br>49 | Myoz1    | chr14 | myozenin_1                                       |
| ENSMUSG0<br>0000069670 | 25.00802035 | 0           | -2.7474 | 8.23E-06       | 0.003222<br>5  | Nkain2   | chr10 | Na+/K+_transportin<br>g_ATPase_interacti<br>ng_2 |
| ENSMUSG0<br>0000070469 | 6.576736783 | 54.96544739 | 2.2874  | 1.83E-05       | 0.005610<br>7  | Adamtsl3 | chr7  | ADAMTS-like_3                                    |
| ENSMUSG0<br>0000070576 | 29.50863953 | 205.7058527 | 2.3429  | 2.19E-07       | 0.000194<br>95 | Mn1      | chr5  | meningioma_1                                     |
| ENSMUSG0<br>0000071723 | 167.4481304 | 28.70561891 | -1.9766 | 0.000111<br>94 | 0.020422       | Gspt2    | chrX  | G1_to_S_phase_tra<br>nsition_2                   |
| ENSMUSG0<br>0000072941 | 134.4927454 | 1194.80721  | 2.2304  | 6.35E-05       | 0.014348       | Sod3     | chr5  | superoxide_dismuta<br>se_3_extracellular         |
| ENSMUSG0<br>0000073988 | 144.3099243 | 25.21490186 | -1.9022 | 0.000311<br>11 | 0.038422       | Ttpa     | chr4  | tocopherol_(alpha)<br>transfer_protein           |
| ENSMUSG0<br>0000074115 | 5.764502398 | 112.5518694 | 2.3087  | 0.000153<br>86 | 0.024219       | Saa1     | chr7  | serum_amyloid_A_<br>1                            |
| ENSMUSG0<br>0000074665 | 10.45585219 | 85.73331316 | 2.3982  | 1.62E-06       | 0.000895<br>7  | Bpifb4   | chr2  | BPI_fold_containing<br>_family_B_member<br>_4    |

|                        |             |             |         |                |                |                   |       |                                                                            |
|------------------------|-------------|-------------|---------|----------------|----------------|-------------------|-------|----------------------------------------------------------------------------|
| ENSMUSG0<br>0000074892 | 2672.728367 | 309.5596118 | -2.0815 | 0.000307<br>89 | 0.038319       | B3galt5           | chr16 | UDP-Gal:betaGlcN<br>Ac_beta_13-galacto<br>syltransferase_poly<br>peptide_5 |
| ENSMUSG0<br>0000075307 | 93.94206338 | 8.810349678 | -2.0901 | 0.000451<br>89 | 0.049021       | Klhl41            | chr2  | kelch-like_41                                                              |
| ENSMUSG0<br>0000076609 | 45.74178347 | 851.0081252 | 2.4902  | 3.34E-05       | 0.009414<br>8  | Igkc              | chr6  | immunoglobulin_ka<br>ppa_constant                                          |
| ENSMUSG0<br>0000076613 | 3.513636023 | 82.2127103  | 2.4639  | 5.04E-05       | 0.012271       | Ighg2b            | chr12 | immunoglobulin_he<br>avy_constant_gam<br>ma_2B                             |
| ENSMUSG0<br>0000078495 | 85.40000803 | 6.890929591 | -2.7078 | 3.19E-07       | 0.000268<br>71 | Gm13157           | chr4  | predicted_gene_13<br>157                                                   |
| ENSMUSG0<br>0000078503 | 311.4759695 | 41.88166013 | -2.1854 | 3.42E-05       | 0.009460<br>7  | Gm13225           | chr4  | predicted_gene_13<br>225                                                   |
| ENSMUSG0<br>0000079243 | 76.36494829 | 2.69511394  | -2.2145 | 0.000330<br>48 | 0.039595       | Xirp1             | chr9  | xin_actin-binding_re<br>peat_containing_1                                  |
| ENSMUSG0<br>0000079259 | 2.215900988 | 44.22081097 | 2.4456  | 4.82E-05       | 0.012185       | Trim71            | chr9  | tripartite_motif-cont<br>aining_71                                         |
| ENSMUSG0<br>0000090066 | 62.85375996 | 228.0504422 | 1.5825  | 0.000323<br>2  | 0.039595       | 1110002E22<br>Rik | chr3  | RIKEN_cDNA_1110<br>002E22_gene                                             |
| ENSMUSG0<br>0000092569 | 30.13941327 | 138.6994022 | 1.7968  | 0.000159<br>96 | 0.024694       | Gm20544           | chr18 | predicted_gene_20<br>544                                                   |
| ENSMUSG0<br>0000093594 | 39.47787749 | 4.065840415 | -2.1285 | 0.000250<br>23 | 0.034337       | Gm20707           | chr4  | predicted_gene_20<br>707                                                   |
| ENSMUSG0<br>0000095079 | 44.42995874 | 1099.897351 | 2.645   | 1.17E-05       | 0.004067<br>6  | Igha              | chr12 | immunoglobulin_he<br>avy_constant_alpha                                    |
